# Supplementary material
Source: MDPI journal article supplement (https://www.mdpi.com/2673-1924/4/3/22)
Supplement: s1 [file s1]

# Status of Coral Reef Communities on the Caribbean Coast of Costa Rica: Are We Talking About Corals or Macroalgae Reefs?

Fabio Quezada-Perez <sup>1</sup>, Sebastián Mena <sup>1</sup>, Cindy Fernández-García <sup>1,2,3,\*</sup> and Juan José Alvarado <sup>1,2,3,\*</sup>

<sup>1</sup> Escuela de Biología, Universidad de Costa Rica, San Pedro, San José 11801, Costa Rica; fabio.29.qp@gmail.com (F.Q.-P.); sebas.menago@gmail.com (S.M.); cindy.fernandezgarcia@ucr.ac.cr (C.F.-G.)

<sup>2</sup> Centro de Investigación en Ciencias del Mar y Limnología, Universidad de Costa Rica, San Pedro, San José 11801, Costa Rica

<sup>3</sup> Centro de Investigación en Biodiversidad y Ecología Tropical, Universidad de Costa Rica, San Pedro, San José 11801, Costa Rica

\* Correspondence: juanalva76@yahoo.com

## Tables

**Table S1.** Survey site coordinates and mean depth.

| Region       | Locality        | Site Code | Lat       | Long       | Mean Depth (m) |
|--------------|-----------------|-----------|-----------|------------|----------------|
| Puerto Viejo | Piedras Blancas | pb2       | 9.64092   | -82.6369   | 6.1            |
| -            | Manzanillo      | ma1       | 9.64572   | -82.65828  | 7              |
| Punta Mona   | Punta Uva       | lp3       | 9.64697   | -82.6837   | 4.1            |
|              |                 | ar4       | 9.64629   | -82.68957  | 7              |
|              |                 | ar14      | 9.644055  | -82.688451 | 4.5            |
|              |                 | se13      | 9.64212   | -82.69675  | 4.8            |
|              | Punta Cocles    | lc10      | 9.64809   | -82.72018  | 6              |
|              | Río Cocles      | rc9       | 9.65136   | -82.72993  | 5.3            |
|              | Puerto Viejo    | pv7       | 9.66142   | -82.7550   | 7              |
|              |                 | sb8       | 9.66149   | -82.74612  | 7.4            |
| Cahuita      | Puerto Vargas   | pv15      | 9.737956  | -82.80584  | 2.6            |
|              |                 | bi16      | 9.737457  | -82.807739 | 2.5            |
|              | Punta Cahuita   | po19      | 9.747712  | -82.818756 | 2              |
|              | -               | le18      | 9.737457  | -82.807739 | 2.5            |
|              | Perezoso        | pe17      | 9.737956  | -82.80584  | 2.5            |
| Moín         | Isla Uvita      | uv20      | 9.99103   | -83.00998  | 6.7            |
| -            |                 | uv21      | 9.99138   | -83.01193  | 3.9            |
| Limón        |                 | uv22      | 9.99432   | -83.00917  | 5.6            |
|              |                 | uv23      | 9.99566   | -83.01221  | 8.4            |
|              |                 | uv28      | 9.992923  | -83.012862 | 3.5            |
|              | Isla Pájaros    | pa24      | 10.017052 | -83.075592 | 4.1            |
|              |                 | pa25      | 10.017063 | -83.075981 | 4.1            |
|              |                 | pa26      | 10.017225 | -83.076276 | 4.1            |
|              | Pájaro Loco     | pl27      | 10.010772 | -83.05102  | 2.1            |

**Table S2.** Coral species registered in the survey sites of the Caribbean coast of Costa Rica

| Family         | Specie                           |
|----------------|----------------------------------|
| Acroporidae    | <i>Acropora palmata</i>          |
| Agariciidae    | <i>Agaricia agaricites</i>       |
|                | <i>Agaricia humilis</i>          |
| Faviidae       | <i>Favia fragum</i>              |
|                | <i>Mycetophyllia lamarckiana</i> |
|                | <i>Pseudodiploria clivosa</i>    |
|                | <i>Pseudodiploria strigosa</i>   |
| Poritidae      | <i>Porites astreoides</i>        |
|                | <i>Porites porites</i>           |
| Montastraeidae | <i>Montastraea cavernosa</i>     |
| Merulinidae    | <i>Orbicella franksi</i>         |
| Rhizangiidae   | <i>Siderastrea radians</i>       |
|                | <i>Siderastrea siderea</i>       |
| Milleporidae   | <i>Millepora complanata</i>      |
| Acroporidae    | <i>Acropora palmata</i>          |
| Agariciidae    | <i>Agaricia agaricites</i>       |
| Agariciidae    | <i>Agaricia agaricites</i>       |

**Table S3.** Similarity Percentages (SIMPER) analysis showing the benthic taxa that contributed the most to the overall dissimilarity between regions.

| Regions                   | Taxa                           | Average $\pm$ SD<br>contribution | % Cumulative<br>contribution |
|---------------------------|--------------------------------|----------------------------------|------------------------------|
| Moín – Limón              | Turf algae                     | 0.081                            | 17                           |
| ~                         | <i>Dictyota / Dictyopteris</i> | 0.065                            | 31                           |
| Cahuíta                   | <i>Agaricia agaricites</i>     | 0.057                            | 43                           |
| Moín – Limón              | <i>Dictyota / Dictyopteris</i> | 0.183                            | 31                           |
| ~                         | Turf algae                     | 0.129                            | 53                           |
| Puerto Viejo – Punta Mona | <i>Acropora palmata</i>        | 0.036                            | 59                           |
| Cahuíta                   | <i>Dictyota / Dictyopteris</i> | 0.196                            | 32                           |
| ~                         | Turf algae                     | 0.143                            | 55                           |
| Puerto Viejo – Punta Mona | <i>Agaricia agaricites</i>     | 0.056                            | 64                           |

**Table S4.** Density, biomass, and fishery value of fish species registered in the survey sites of the Caribbean coast of Costa Rica. Fishery value was based on [1].

| Order                      | Family         | Specie                   | Mean Density<br>± SD<br>(ind / 100 m2) | Mean Biomass<br>± SD<br>(g / 100 m2) | Fishery<br>Value<br>(USD / kg) |
|----------------------------|----------------|--------------------------|----------------------------------------|--------------------------------------|--------------------------------|
| Acanthuriformes            | Acanthuridae   | Acanthurus chirurgus     | 8.53 ± 30                              | 1381.67 ± 5205.87                    | 0                              |
|                            |                | Acanthurus coeruleus     | 0.17 ± 0.37                            | 10.27 ± 28.29                        | 0                              |
|                            |                | Acanthurus tractus       | 7.79 ± 29.38                           | 1354.60 ± 5207.38                    | 0                              |
|                            | Chaetodontidae | Chaetodon capistratus    | 0.58 ± 1.17                            | 16.87 ± 34.34                        | 0                              |
|                            |                | Chaetodon ocellatus      | 0.38 ± 0.65                            | 18.00 ± 38.06                        | 0                              |
|                            |                | Chaetodon striatus       | 0.04 ± 0.17                            | 0.53 ± 2.07                          | 0                              |
|                            |                | Chaetodon striatus       | 0.14 ± 0.37                            | 6.67 ± 16.50                         | 0                              |
|                            |                | Chaetodon striatus       | 0.20 ± 0.39                            | 10.80 ± 29.64                        | 0                              |
|                            | Pomacanthidae  | Holacanthus ciliaris     | 0.04 ± 0.17                            | 5.47 ± 21.17                         | 0                              |
| Acropomatiformes           | Pempheridae    | Pempheris schomburgkii   | 0.27 ± 1.03                            | 3.53 ± 13.68                         | 0                              |
| Blenniiformes              | Blenniidae     | Ophioblennius macclurei  | 0.27 ± 0.61                            | 1.17 ± 6.65                          | 0                              |
|                            | Labrisomidae   | Labrisomus sp.           | 0.09 ± 0.34                            | 1.07 ± 4.13                          | 0                              |
| Carangiformes              | Carangidae     | Caranx bartholomaei      | 0.22 ± 0.53                            | 20.40 ± 49.11                        | 4.38*                          |
|                            |                | Caranx ruber             | 0.06 ± 0.26                            | 7.33 ± 21.06                         | 4.38                           |
|                            |                | Elagatis bipinnulata     | 0.13 ± 0.52                            | 12.07 ± 46.73                        | 4.41*                          |
|                            |                | Elagatis bipinnulata     | 0.02 ± 0.07                            | 1.00 ± 3.87                          | 4.41*                          |
| Centrarchiformes           | Cirrhitidae    | Amblycirrhitus pinos     | 0.006 ± 0.022                          | 0.07 ± 0.26                          | 0                              |
|                            | Kyphosidae     | Kyphosus sectatrix       | 3.91 ± 11.00                           | 526.67 ± 1411.43                     | 2.20*                          |
| Eupercaria incertae sedis  | Haemulidae     | Anisotremus virginicus   | 2.30 ± 3.45                            | 293.87 ± 497.97                      | 4.27                           |
|                            |                | Anisotremus sp.          | 0.64 ± 1.71                            | 93.00 ± 254.83                       | 4.27                           |
|                            |                | Haemulon aurolineatum    | 0.40 ± 1.55                            | 41.33 ± 160.08                       | 4.27                           |
|                            |                | Haemulon carbonarium     | 0.86 ± 2.76                            | 127.60 ± 448.36                      | 4.28                           |
|                            |                | Haemulon macrostomum     | 0.13 ± 0.37                            | 10.33 ± 27.38                        | 4.28                           |
|                            |                | Haemulon macrostomum     | 0.22 ± 0.59                            | 19.40 ± 69.28                        | 4.28                           |
|                            |                | Haemulon sciurus         | 0.04 ± 0.17                            | 2.20 ± 8.52                          | 4.28                           |
|                            | Labridae       | Bodianus rufus           | 38.75 ± 27.60                          | 188.40 ± 143.98                      | 0                              |
|                            |                | Halichoeres bivittatus   | 0.006 ± 0.022                          | 0.27 ± 1.03                          | 0                              |
|                            |                | Halichoeres garnoti      | 5.42 ± 6.58                            | 38.27 ± 65.67                        | 0                              |
|                            |                | Halichoeres maculipinna  | 0.01 ± 0.04                            | 2.20 ± 8.52                          | 0                              |
|                            |                | Halichoeres pictus       | 0.81 ± 1.57                            | 9.33 ± 15.29                         | 0                              |
|                            |                | Halichoeres pictus       | 0.04 ± 0.17                            | 0.47 ± 1.80                          | 0                              |
|                            |                | Halichoeres radiatus     | 0.11 ± 0.34                            | 3.86 ± 14.17                         | 0                              |
|                            |                | Thalassoma bifasciatum   | 0.11 ± 0.34                            | 3.86 ± 14.17                         | 0                              |
|                            |                | Lutjanus apodus          | 32.36 ± 26.18                          | 136.33 ± 89.89                       | 0                              |
|                            |                | Lutjanus apodus          | 1.91 ± 3.83                            | 272.86 ± 903.13                      | 5.52                           |
|                            | Lutjanidae     | Lutjanus synagris        | 1.29 ± 3.39                            | 267.80 ± 904.64                      | 5.52                           |
|                            |                | Ocyurus chrysurus        | 0.62 ± 2.21                            | 2.00 ± 7.74                          | 5.44                           |
|                            |                | Ocyurus chrysurus        | 0.006 ± 0.022                          | 3.06 ± 11.87                         | 5.31                           |
|                            | Scaridae       | Cryptotomus roseus       | 3.27 ± 5.92                            | 267.80 ± 488.70                      | 0                              |
|                            |                | Nicholsina usta          | 0.006 ± 0.022                          | 0.000 ± 0.000                        | 0                              |
|                            |                | Sparisoma rubripinne     | 0.29 ± 0.80                            | 1.47 ± 4.03                          | 0                              |
|                            |                | Sparisoma viride         | 0.98 ± 1.47                            | 96.7 ± 204.09                        | 4.14                           |
|                            |                | Sparisoma viride         | 2.00 ± 5.47                            | 169.67 ± 407.51                      | 4.14                           |
|                            | Sciaenidae     | Sciaenidae sp.           | 0.01 ± 0.04                            | 0.40 ± 1.54                          | 5.51*                          |
| Holocentriiformes          | Holocentridae  | Holocentrus adscensionis | 1.83 ± 6.51                            | 88.40 ± 302.65                       | 2.20                           |
|                            |                | Holocentrus rufus        | 0.077 ± 0.30                           | 7.73 ± 29.95                         | 2.20                           |
|                            |                | Sargocentron vexillarium | 0.006 ± 0.02                           | 0.07 ± 0.26                          | 2.20                           |
|                            |                | Sargocentron vexillarium | 1.75 ± 6.52                            | 80.60 ± 303.40                       | 0                              |
| Mulliformes                | Mullidae       | Pseudupeneus maculatus   | 0.04 ± 0.15                            | 1.80 ± 6.98                          | 0                              |
| Ovalentaria incertae sedis | Pomacentridae  | Abudefduf saxatilis      | 45.65 ± 27.43                          | 686.13 ± 967.85                      | 0                              |
|                            |                | Microspathodon chrysurus | 8.31 ± 16.11                           | 273.87 ± 898.48                      | 0                              |
|                            |                | Stegastes adustus        | 3.20 ± 4.73                            | 162.80 ± 320.46                      | 0                              |
|                            |                | Stegastes diencaeus      | 30.17 ± 25.53                          | 223.93 ± 197.44                      | 0                              |
|                            |                | Stegastes diencaeus      | 3.38 ± 8.97                            | 23.07 ± 61.01                        | 0                              |
|                            |                | Stegastes leucostictus   | 0.42 ± 1.62                            | 0.93 ± 3.61                          | 0                              |

|                   |                            |                          |               |               |      |
|-------------------|----------------------------|--------------------------|---------------|---------------|------|
| Perciformes       | Scorpaenidae<br>Serranidae | Stegastes partitus       | 0.15 ± 0.46   | 0.67 ± 1.80   | 0    |
|                   |                            | Stegastes xanthurus      | 0.02 ± 0.06   | 1.07 ± 4.13   | 0    |
|                   |                            | Pterois volitans         | 0.22 ± 0.41   | 8.20 ± 17.76  | 0    |
|                   |                            |                          | 0.28 ± 0.62   | 6.73 ± 14.24  |      |
|                   |                            | Cephalopholis cruentata  | 0.04 ± 0.17   | 3.00 ± 11.62  | 6.11 |
|                   |                            | Diplectrum formosum      | 0.21 ± 0.56   | 0.27 ± 0.70   | 0    |
|                   |                            | Epinephelus adscensionis | 0.006 ± 0.022 | 1.53 ± 5.98   | 6.11 |
|                   |                            | Rypticus saponaceus      | 0.02 ± 0.07   | 1.93 ± 7.49   | 0    |
| Tetraodontiformes | Monacanthidae              |                          | 0.06 ± 0.17   | 2.73 ± 9.06   |      |
|                   |                            | Cantherhines pullus      | 0.05 ± 0.17   | 2.67 ± 9.04   | 0    |
|                   |                            | Stephanolepis hispida    | 0.006 ± 0.022 | 0.07 ± 0.26   | 0    |
|                   | Tetraodontidae             |                          | 10.25 ± 16.79 | 36.80 ± 63.68 |      |
|                   |                            | Canthigaster jamestyleri | 10.18 ± 16.75 | 36.53 ± 63.52 | 0    |
|                   |                            | Canthigaster rostrata    | 0.07 ± 0.18   | 7.33 ± 21.06  | 0    |

\*Species with fishery commercial value no listed on [1]

## References

1. Lester, S.E.; Rassweiler, A.; McCoy, S.J.; Dubel, A.K.; Donovan, M.K.; Miller, M.W.; Miller, S.D.; Ruttenberg, B.I.; Samhour, J.F.; Hay, M.E. Caribbean Reefs of the Anthropocene: Variance in Ecosystem Metrics Indicates Bright Spots on Coral Depauperate Reefs. *Glob. Change Biol.* **2020**, *26*, 4785–4799, doi:10.1111/gcb.15253.
